# Supplementary material for: Vascular endothelial cell expression of JAK2V617F is sufficient to promote a pro-thrombotic state due to increased P-selectin expression
Source: PubMed Central journal article supplement — Haematologica. 2018 Aug 31;104(1):70–81. doi: 10.3324/haematol.2018.195321 (PMC6312008; doi:10.3324/haematol.2018.195321), 2019-01
Supplement: 2018_195321-Disclosures_and_Contributions.pdf [file 2018_195321-Disclosures_and_Contributions.pdf]

Haematologica  
HAEMATOL/2018/195321  
Version 4

Vascular endothelial cell expression of JAK2V617F is sufficient to promote a pro-thrombotic state due to increased P-selectin expression

Alexandre Guy, Virginie Gourdou-Latyszenok, Nicolas Le Lay, Claire Peghaire, Badr Kilani, Juliana Vieira Dias, Cécile Duplaa, Marie-Ange Renault, Cécile Denis, Jean Luc Villeval, Yacine Boulaftali, Martine Jandrot-Perrus, Thierry Couffinhal, and Chloe James

Disclosures: This study was supported by research grants from ANR-DFG JAKPOT (N° ANR-14-CE35- 0022-02), INSERM, The Fondation Bettencourt Schueller, the Aquitaine Region. AG was supported by research grant from INSERM (Poste Accueil INSERM) and VGL by ANR-DFG JAKPOT. The authors declare no competing financial interest

Contributions: A.G. contributed to designing and performing experiments, analysis and interpretation of data, and preparing the manuscript. V.G.L contributed to designing and performing experiments, analysis and interpretation of data, and preparing the manuscript. N.L.L., C.P., B.K., J.V.D. contributed to designing and performing experiments, analysis and interpretation of data. M.A.R contributed to performing experiments, analysis and interpretation of data. C.D., C.D., J.L.V. contributed to analysis and interpretation data. Y.B., M.J.P. and T.C. contributed to designing experiments, analysis and interpretation of data. C.J. contributed to supervising the study, designing experiments, analysis and interpretation of data, and preparing the manuscript. All authors discussed the results and commented on the manuscript.
