# Supplementary material for: Vascular endothelial cell expression of JAK2V617F is sufficient to promote a pro-thrombotic state due to increased P-selectin expression
Source: PubMed Central journal article supplement — Haematologica. 2018 Aug 31;104(1):70–81. doi: 10.3324/haematol.2018.195321 (PMC6312008; doi:10.3324/haematol.2018.195321), 2019-01
Supplement: HAEMATOL-2018-195321v4-Guy-01.pdf [file HAEMATOL-2018-195321v4-Guy-01.pdf]

# JAK2V617F endothelial cells play a role in thrombus formation

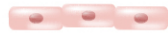

In vitro model of endothelial cells overexpressing JAK2V617F

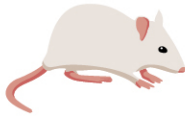

In vivo model of mice with endothelial-specific JAK2V617F expression

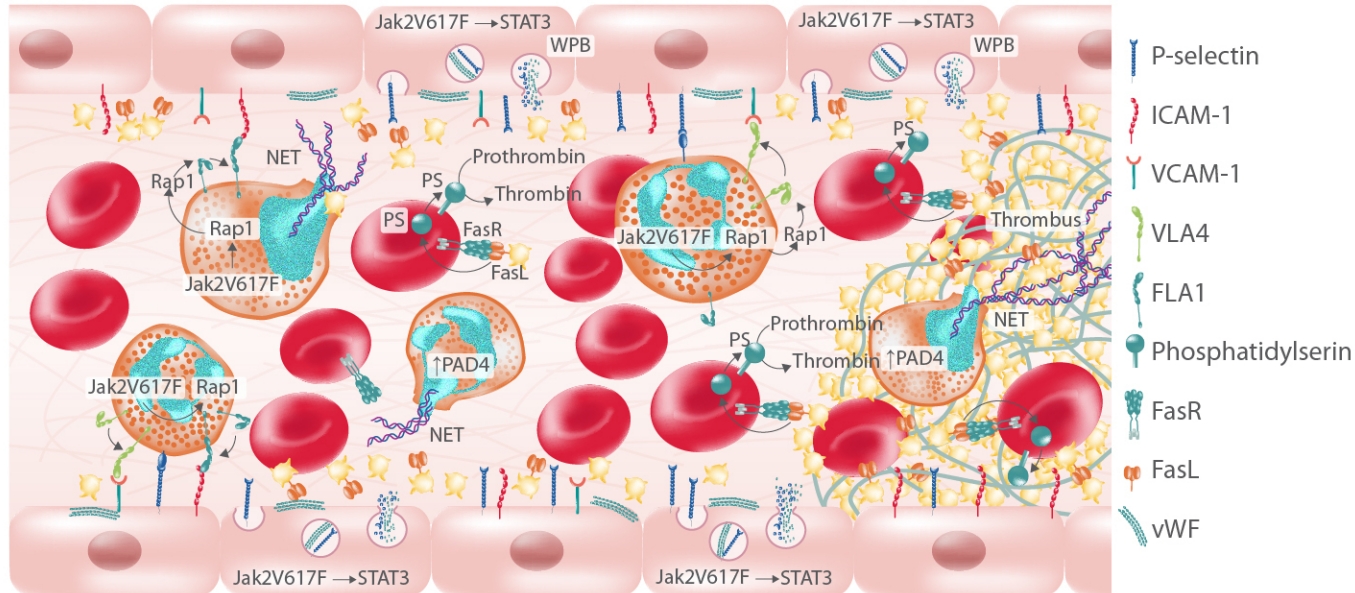

## JAK2V617F ECs have a pro-adhesive phenotype associated with increased endothelial P-selectin exposure

- P-selectin is stored in exocytotic organelles called Weibel-Palade bodies (WPB) together with von Willebrand factor (vWF)
- Exocytosis of WPBs leads to cell surface expression of vWF and P-selectin
- The cell surface exposure of P selectin induces leukocyte adhesion and leads to thrombus formation
- Treatment with hydroxyurea decreases P-selectin endothelial expression and thrombus formation
